# Supplementary material for: Randomized trial of surveillance with abbreviated MRI in women with a personal history of breast cancer– impact on patient anxiety and cancer detection
Source: PubMed Central journal article supplement (PMC9287889; doi:10.1186/s12885-022-09792-x), 2022-07-15
Supplement: 12885_2022_9792_MOESM1_ESM.pdf [file 12885_2022_9792_MOESM1_ESM.pdf]

## Breast Cancer Worry Questionnaire

Study ID: \_\_\_\_\_ Date: \_\_\_\_\_

Please circle the response which best describes your feelings.

### *Worry Frequency*

1. How worried are you about getting breast cancer someday?

1 = not at all; 2 = rarely; 3 = sometimes; 4 = often; 5 = almost all the time

### *Worry Impact*

2. How much does your worry affect your mood?

1 = not at all; 2 = a little; 3 = somewhat; 4 = a lot

3. How much does your worry affect your ability to perform your daily activities?

1 = not at all; 2 = a little; 3 = somewhat; 4 = a lot

Patient ID#: \_\_\_\_\_

Date: \_\_\_\_\_

### Health Status Questionnaire (HSQ-12)

1. In general, would you say your health is: (Circle one number)

- Excellent.....1
- Very Good.....2
- Good... ..3
- Fair..... 4
- Poor..... 5

The following items are about activities you might do during a typical day. Does your health now limit you in these activities? If so, how much? (Circle one number on each line)

|                                       | Yes,<br>Limited a lot | Yes,<br>limited a little | No, not<br>limited at all |
|---------------------------------------|-----------------------|--------------------------|---------------------------|
| 2. Lifting or carrying groceries      | 1                     | 2                        | 3                         |
| 3. Climbing several flights of stairs | 1                     | 2                        | 3                         |
| 4. Walking several blocks             | 1                     | 2                        | 3                         |

5. During the past 4 weeks how much difficulty did you have doing your work or other regular daily activities as a result of your physical health? (Circle one number)

- None at all..... 1
- A little bit..... 2
- Moderately..... 3
- Quite a bit... ..4
- Couldn't do any work...5

6. During the past 4 weeks, to what extent have you accomplished less than you would like in your work or other daily activities as a result of emotional problems (such as feeling depressed or anxious)? (Circle one number)

- None at all..... 1
- A little bit..... 2
- Moderately..... 3
- Quite a bit... ..4
- Couldn't do any work...5

7. During the past 4 weeks, to what extent has your physical health or emotional problems interfered with your normal social activities with family, friends, neighbours, or groups? (Circle one number)

- None at all..... 1
- A little bit..... 2
- Moderately..... 3
- Quite a bit... ..4
- Couldn't do any work...5

8. How much bodily pain have you had during the past 4 weeks? (Circle one number)

- None..... 1
- Very mild..... 2
- Mild ..... 3
- Moderate..... 4
- Severe ..... 5
- Very severe..... 6

These questions are about how you feel things have been with you during the past 4 weeks. For each question, please give the one answer that comes closest to the way you have been feeling.

How much of the time during the past 4 weeks... (Circle one number on each line)

|                                         | All of the time | Most of the time | A good bit of the time | Some of the time | Little of the time | None of the time |
|-----------------------------------------|-----------------|------------------|------------------------|------------------|--------------------|------------------|
| 9. Have you felt calm and peaceful?     | 1               | 2                | 3                      | 4                | 5                  | 6                |
| 10. Did you have a lot of energy?       | 1               | 2                | 3                      | 4                | 5                  | 6                |
| 11. Have you felt downhearted and blue? | 1               | 2                | 3                      | 4                | 5                  | 6                |
| 12. Have you been happy?                | 1               | 2                | 3                      | 4                | 5                  | 6                |

Patient ID: \_\_\_\_\_

Date: \_\_\_\_\_

## The Penn State Worry Questionnaire (PSWQ)

Instructions: Rate each of the following statements on a scale of 1 (“not at all typical of me”) to 5 (“very typical of me”). Please do not leave any items blank.

|                                                                                            | Not at all typical<br>of me |   |   |   |   | Very typical<br>of me |  |  |  |  |
|--------------------------------------------------------------------------------------------|-----------------------------|---|---|---|---|-----------------------|--|--|--|--|
| 1. If I do not have enough time to do everything, I do not worry about it.                 | 1                           | 2 | 3 | 4 | 5 |                       |  |  |  |  |
| 2. My worries overwhelm me.                                                                | 1                           | 2 | 3 | 4 | 5 |                       |  |  |  |  |
| 3. I do not tend to worry about things.                                                    | 1                           | 2 | 3 | 4 | 5 |                       |  |  |  |  |
| 4. Many situations make me worry.                                                          | 1                           | 2 | 3 | 4 | 5 |                       |  |  |  |  |
| 5. I know I should not worry about things, but I just cannot help it.                      | 1                           | 2 | 3 | 4 | 5 |                       |  |  |  |  |
| 6. When I am under pressure I worry a lot.                                                 | 1                           | 2 | 3 | 4 | 5 |                       |  |  |  |  |
| 7. I am always worrying about something.                                                   | 1                           | 2 | 3 | 4 | 5 |                       |  |  |  |  |
| 8. I find it easy to dismiss worrisome thoughts.                                           | 1                           | 2 | 3 | 4 | 5 |                       |  |  |  |  |
| 9. As soon as I finish one task, I start to worry about everything else I have to do.      | 1                           | 2 | 3 | 4 | 5 |                       |  |  |  |  |
| 10. I never worry about anything.                                                          | 1                           | 2 | 3 | 4 | 5 |                       |  |  |  |  |
| 11. When there is nothing more I can do about a concern, I do not worry about it any more. | 1                           | 2 | 3 | 4 | 5 |                       |  |  |  |  |
| 12. I have been a worrier all my life.                                                     | 1                           | 2 | 3 | 4 | 5 |                       |  |  |  |  |
| 13. I notice that I have been worrying about things.                                       | 1                           | 2 | 3 | 4 | 5 |                       |  |  |  |  |
| 14. Once I start worrying, I cannot stop.                                                  | 1                           | 2 | 3 | 4 | 5 |                       |  |  |  |  |
| 15. I worry all the time.                                                                  | 1                           | 2 | 3 | 4 | 5 |                       |  |  |  |  |
| 16. I worry about projects until they are all done.                                        | 1                           | 2 | 3 | 4 | 5 |                       |  |  |  |  |
